# Supplementary material
Source: PubMed Central journal article supplement (PMC3188738)

**Supplemental Figure 2 Montage image of TPP1 distribution.** Fifteen week-old *Tpp1*(*-/-*) mice were administered three daily 80  $\mu$ L infusions of artificial CSF (vehicle) or 10  $\mu$ g/ $\mu$ L rhTPP1 (enzyme) and killed 24 hours after the final dose. Sagittal sections immunostained with anti-TPP1 monoclonal antibody and Alexafluor 555 conjugated donkey-anti-mouse IgG were visualized using a Nikon Eclipse 80i with a 4x objective.

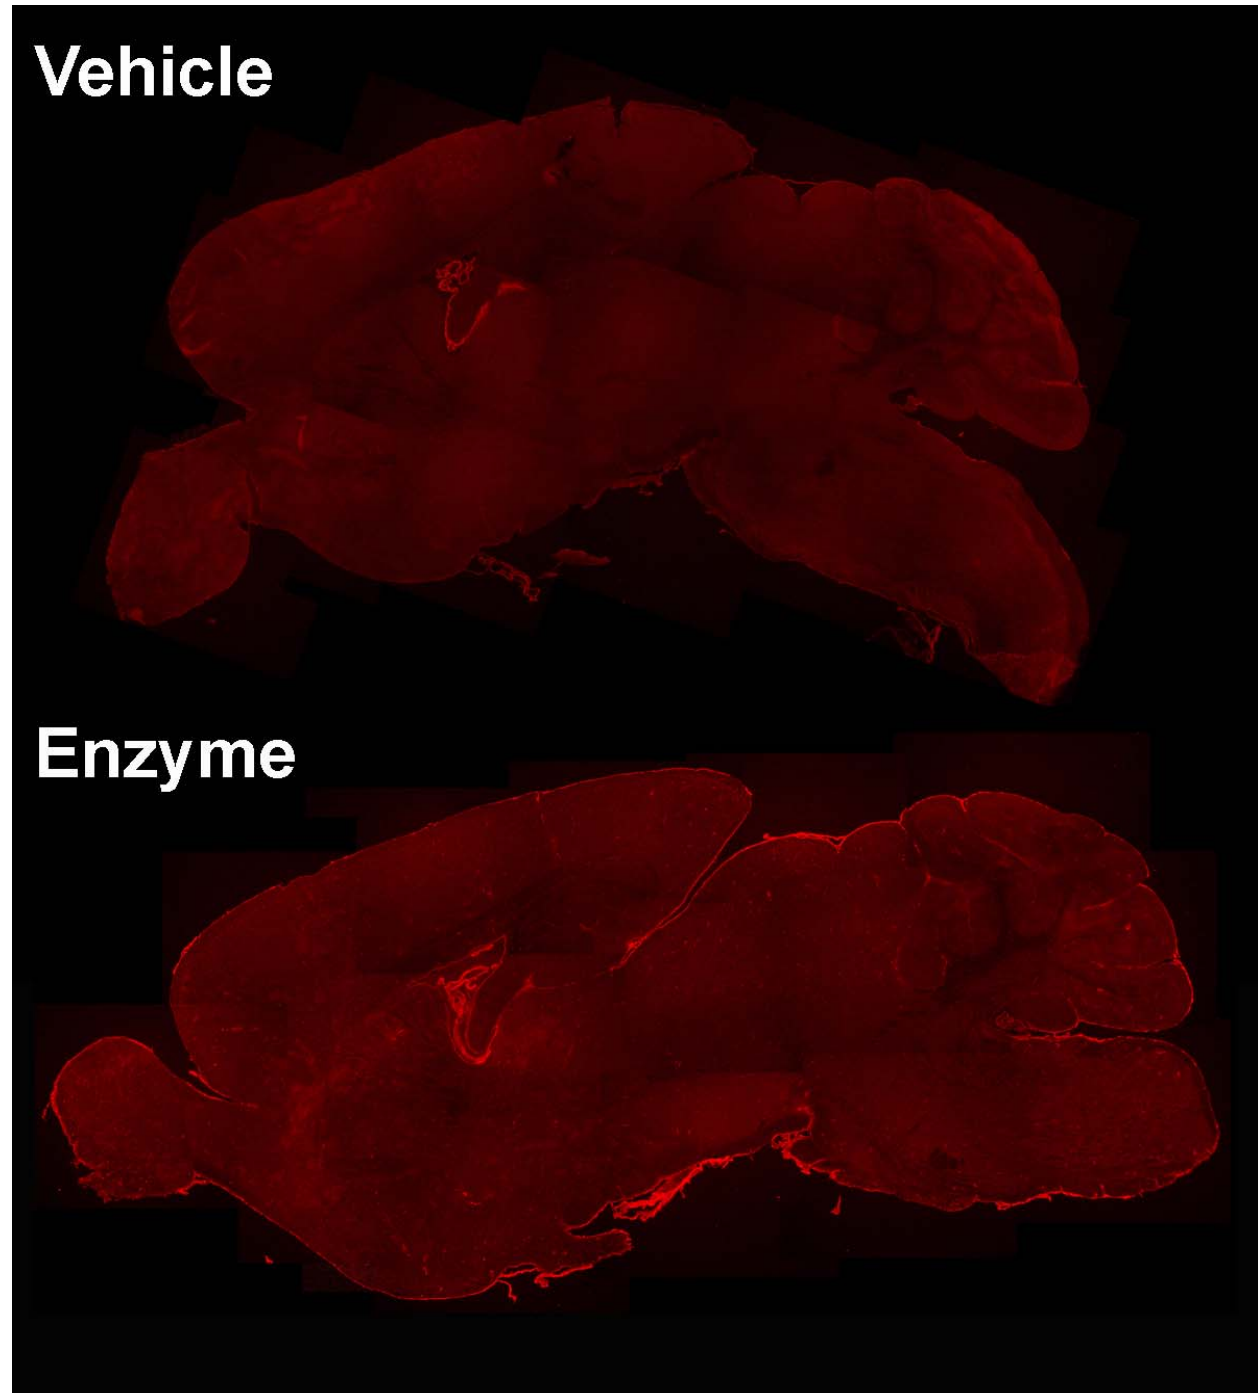

Supplement: mt2011130x2.pdf [file mt2011130x2.pdf]
