# Supplementary material
Source: PubMed Central journal article supplement (PMC3188738)

**Supplemental Figure 3 Effect of Intrathecally administrated rhTPP1 on SCMAS storage in liver.** Nineteen week-old *Tpp1*<sup>-/-</sup> mice were administered three daily 80  $\mu$ L infusions of artificial CSF (V1-2) or 10  $\mu$ g/ $\mu$ L rhTPP1 (E1-3) and killed 24 hours after the final dose. Relative intensities (mean  $\pm$  standard deviation) of SCMAS staining in liver for vehicle-treated (n=2), enzyme-treated (n=3), and wild-type age controls (n=2), respectively, were as follows: 1.00 $\pm$ 0.10, 0.48 $\pm$ 0.06, 0.30 $\pm$ 0.01. Note that this signal includes both normal mitochondrial and stored SCMAS.

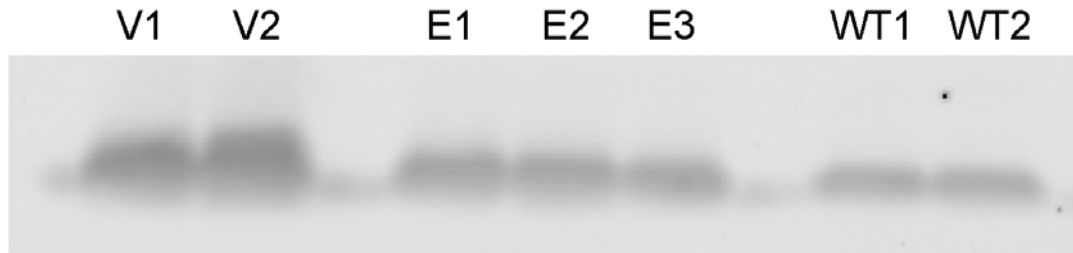

Supplement: mt2011130x3.pdf [file mt2011130x3.pdf]
