# Supplementary material
Source: PubMed Central journal article supplement (PMC3188738)

**Supplemental Figure S4. Uptake of intrathecally administrated rhTPP1 in young mice.** Four-week old *Tpp1*<sup>-/-</sup> mice (n=4) were administered three daily 40  $\mu$ L infusions of 10  $\mu$ g/ $\mu$ L rhTPP1 (Enzyme) and killed 24 hours after the final dose. TPP1 activity in brain was measured and compared to the levels in wild-type animals (WT-adult: wild-type, ~12 weeks old; WT-young: wild-type mice, ~4 weeks old).

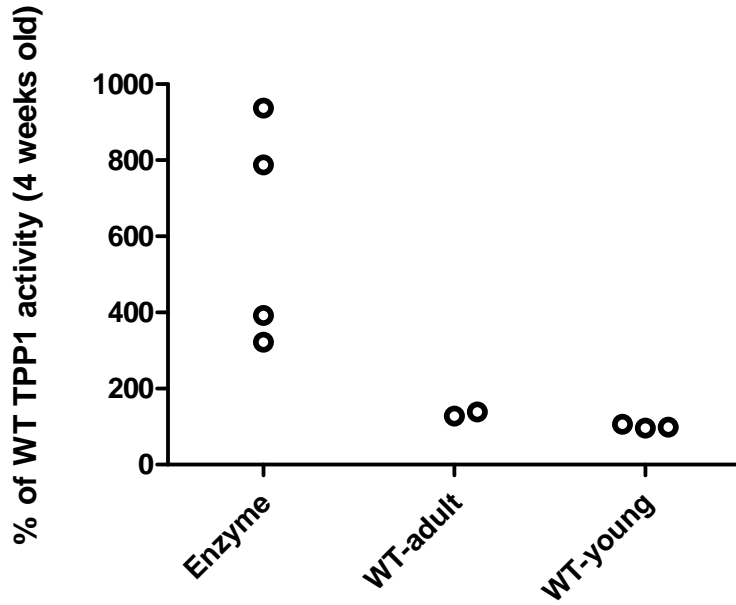

Supplement: mt2011130x4.pdf [file mt2011130x4.pdf]
