# Supplementary material
Source: PubMed Central journal article supplement (PMC3188738)

**Supplemental Figure S5. Gait analysis.** Representative patterns are shown for animals with n=3-7 animals per time-point for each cohort except for the vehicle-treated group where only a single animal survived to eighteen weeks. Purple and orange represent fore- and hind-limb placement, respectively. Contrast is optimized for each individual image due to differences in inking.

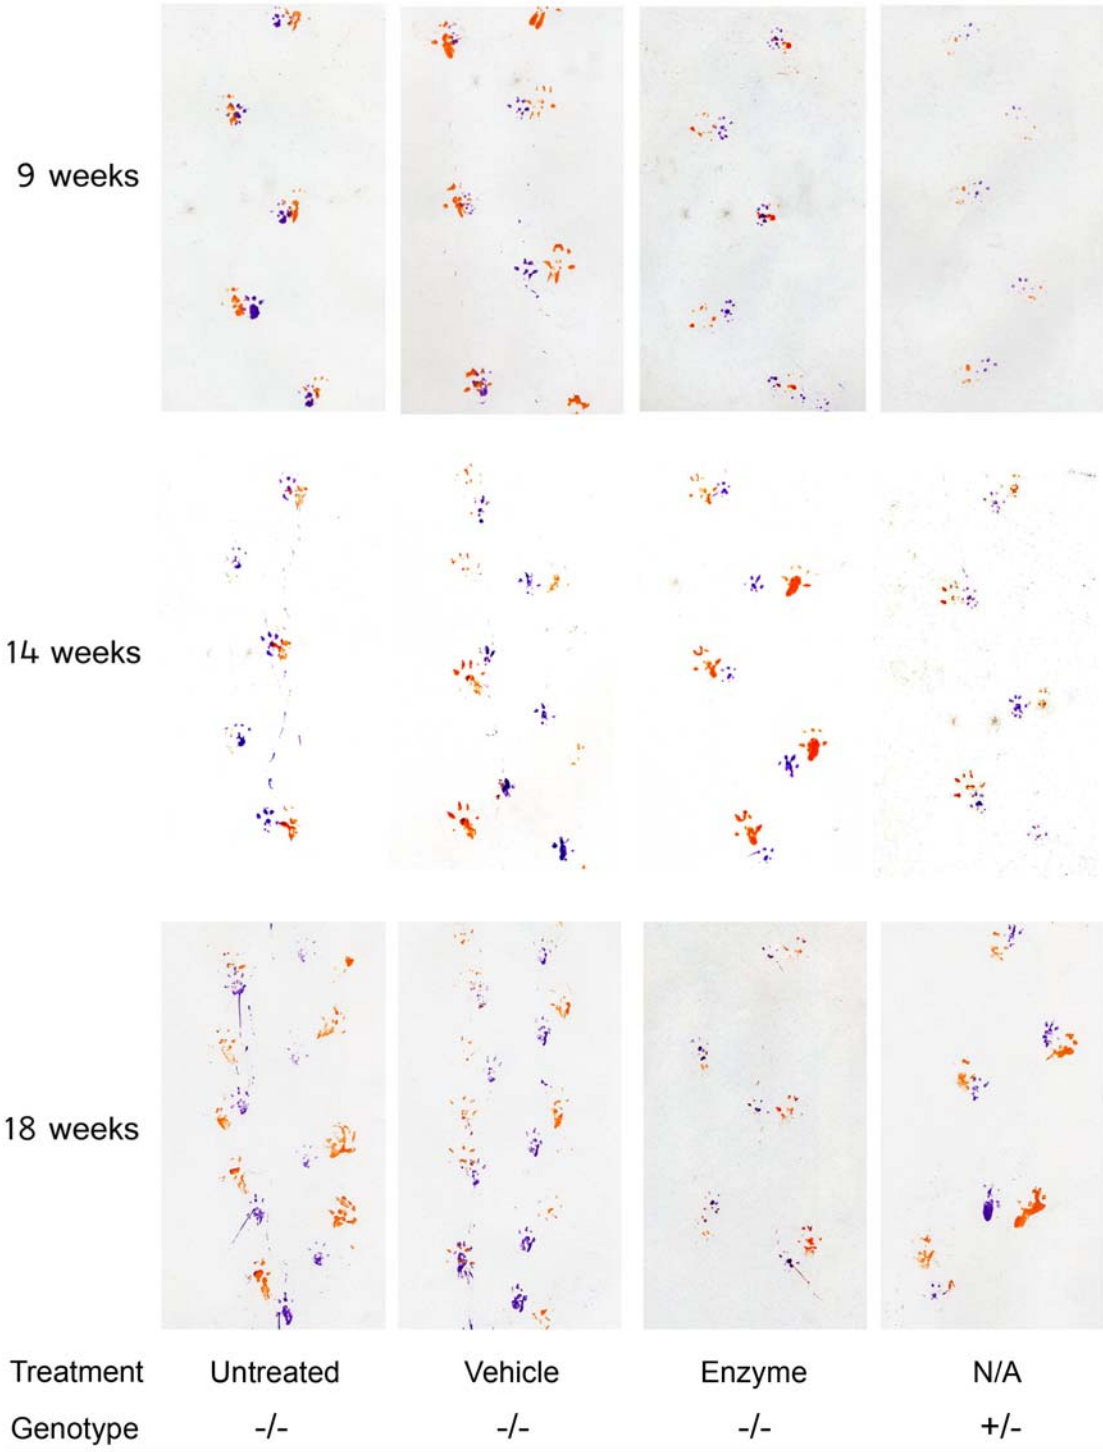

Supplement: mt2011130x5.pdf [file mt2011130x5.pdf]
