# Supplementary material
Source: PubMed Central journal article supplement (PMC3188738)

**Supplemental Figure S6. Effect of intravenous administration on survival.** Four-week old *Tpp1*<sup>-/-</sup> mice were administered three daily 40  $\mu$ L infusions of artificial CSF (vehicle) (n=9) or 10  $\mu$ g/ $\mu$ L rhTPP1 (enzyme) (n=10). Survival date from untreated *Tpp1*<sup>-/-</sup> mice (**Figure 5**) represents a historical control. Median survival was: vehicle, 134 days; enzyme, 106 days; untreated, 124.5 days.

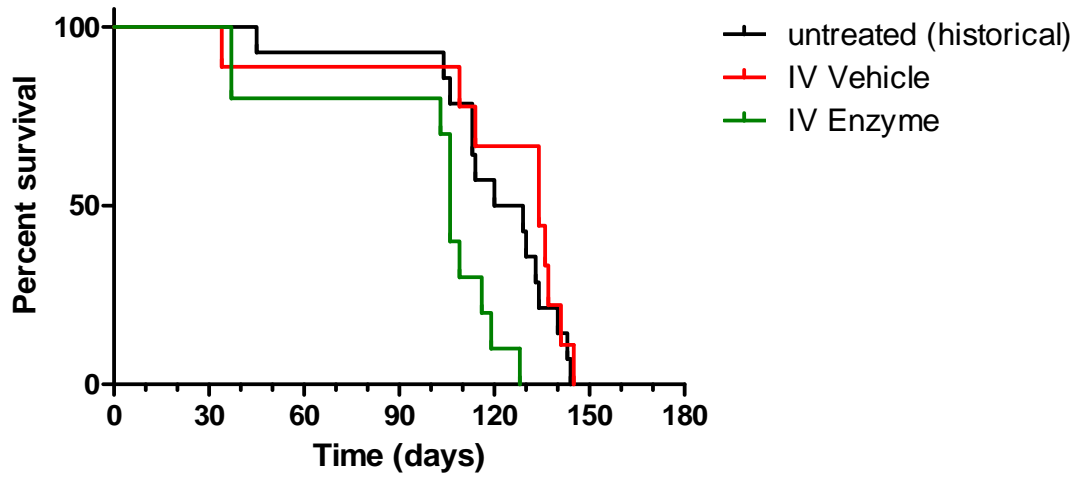

Supplement: mt2011130x6.pdf [file mt2011130x6.pdf]
